# Supplementary material for: Hydrogel-based bioassay sheets for in vitro evaluation of contraction-dependent metabolic regulation in skeletal muscle cells
Source: Royal Society of Chemistry journal article supplement (doi:10.1039/c3bm60179j), 2013-10-24
Supplement: c3bm60179j.pdf [file c3bm60179j.pdf]

## Supplementals

### Hydrogel-Based Imaging Sensor Sheets for In-Vitro Assay of Contraction-Dependent Metabolic Regulation in Skeletal Muscle Cells

Kuniaki Nagamine,<sup>1,2</sup> Kohei Okamoto,<sup>1</sup> Shingo Otani,<sup>1</sup> Hirokazu Kaji,<sup>1,2</sup> Makoto Kanzaki,<sup>2,3</sup> Matsuhiko Nishizawa<sup>1,2</sup>

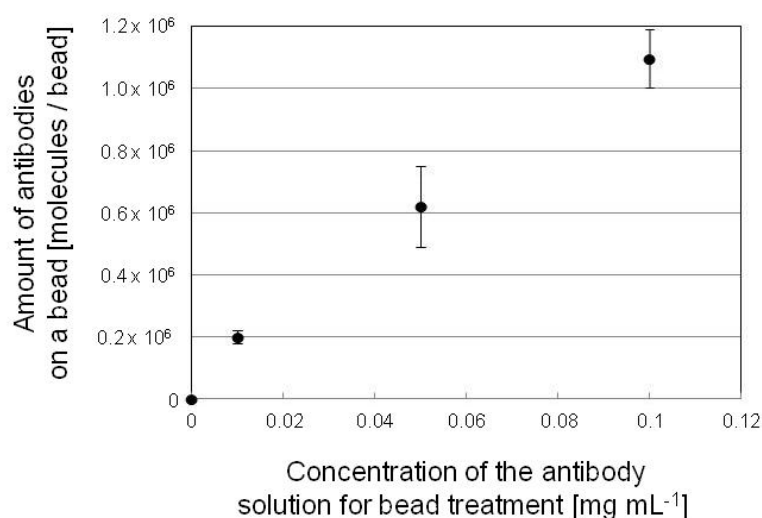

**Support Figure S1** Amount of the Alexa Fluor 488-conjugated antibodies on a bead depending on concentration of the antibody solution for bead treatment. Each data point is the mean of three measurements  $\pm$  SD. The amount of antibody was calculated from the fluorescent intensity of the bead using a calibration curve prepared as follows: A concentration gradient of individual Alexa Fluor 488-conjugated antibody was prepared by diluting stock antibody solution in distilled water, and then spotted on a poly-L-lysine-coated slide (Matsunami Glass Co. Ltd.) with a known volume in triplicates and dried. This calibration slide was observed using a fluorescent microscope and the intensity of each spot was quantified.

## Supplementals

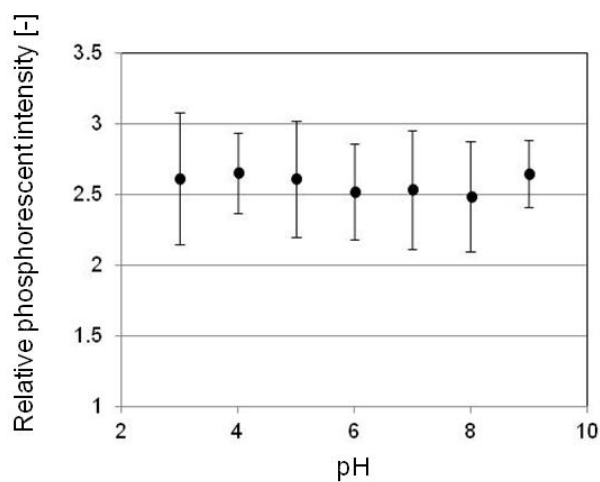

**Support Fig. S2** Relative phosphorescent intensity of the oxygen sensor sheet in a Britton Robinson buffer (50 mM composed of 16.67 mM  $\text{H}_3\text{BO}_3$ , 16.67 mM  $\text{H}_3\text{PO}_4$ , 16.67 mM acetic acid in distilled water. pH 3-9). The relative phosphorescent intensity represents the ratio between the intensity detected at oxygen concentration of 0 mM ( $\text{N}_2$ -saturated condition) and 0.22 mM (air-saturated condition).

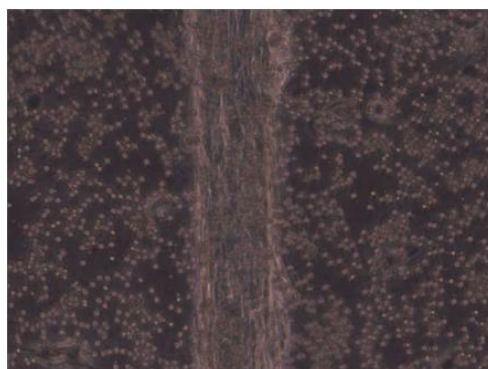

**Support Movie S1** Synchronous contraction of a myotube band pattern with sensor microbeads electrically stimulated at 1 Hz frequency ( $0.7 \text{ V mm}^{-1}$  amplitude, 2 ms duration).
